# Supplementary material for: Uncertainties in deforestation emission baseline methodologies and implications for carbon markets
Source: PubMed Central journal article supplement (PMC10719246; doi:10.1038/s41467-023-44127-9), 2023-12-13
Supplement: 41467_2023_44127_MOESM3_ESM.pdf [file 41467_2023_44127_MOESM3_ESM.pdf]

## **Description of Additional Supplementary Files**

**File Name:** Supplementary Data 1

**Description:** This file contains a summary of project details, methodology variables, and deforestation risk mapping variables and methods for VCS VM0015 Projects, Plan Vivo Projects, and UNFCCC FRL/FREL Submissions.
